# Supplementary material for: Epidemiology of sport-related concussion rates in female contact/collision sport: a systematic review
Source: HighWire-hosted journal article supplement (doi:10.1136/bmjsem-2022-001346), 2022-09-01
Supplement: bmjsem-2022-001346supp001_data_supplement.pdf [file bmjsem-2022-001346supp001_data_supplement.pdf]

| <b>Data Extraction Table for Concussion Incidence</b> |  |
|-------------------------------------------------------|--|
| <b>Method</b>                                         |  |
| Reference                                             |  |
| Affiliation/Source of Funds                           |  |
| Study Design                                          |  |
| Level of Evidence                                     |  |
| Location                                              |  |
| Population Type                                       |  |
| Sample Size                                           |  |
| Descriptive Statistics (if available)                 |  |
| Exposure Type (Training/Match)                        |  |
| Database used (if applicable)                         |  |
| Length of Observation                                 |  |
| Diagnosis (Physiotherapist/AT/Medical)                |  |
| Diagnostic Tool (N/A if not stated)                   |  |
| <b>Results</b>                                        |  |
| Number of Exposures                                   |  |
| Number of Concussions                                 |  |
| Incidence Rate                                        |  |
| <b>Overview</b>                                       |  |
| Quality Assessment Outcome                            |  |
| Conclusion                                            |  |
| Any further comments                                  |  |
