# Supplementary material for: Epidemiology of sport-related concussion rates in female contact/collision sport: a systematic review
Source: HighWire-hosted journal article supplement (doi:10.1136/bmjsem-2022-001346), 2022-09-01
Supplement: bmjsem-2022-001346supp002_data_supplement.pdf [file bmjsem-2022-001346supp002_data_supplement.pdf]

## Quality Tool

|                                                                                                            |                                                                                                                                                                                                                                              |                                  |                                  |   |   |   |
|------------------------------------------------------------------------------------------------------------|----------------------------------------------------------------------------------------------------------------------------------------------------------------------------------------------------------------------------------------------|----------------------------------|----------------------------------|---|---|---|
| Reviewer:                                                                                                  |                                                                                                                                                                                                                                              | Date:                            |                                  |   |   |   |
| Author:                                                                                                    |                                                                                                                                                                                                                                              | Year:                            |                                  |   |   |   |
| <b>ELIGIBILITY CRITERIA</b>                                                                                |                                                                                                                                                                                                                                              |                                  |                                  |   |   |   |
| 1                                                                                                          | Was the study conducted with <b>healthy female athletes participating in collision/contact sports</b> ?                                                                                                                                      | Yes <input type="checkbox"/>     | No <input type="checkbox"/>      |   |   |   |
| 2                                                                                                          | Was overall <b>concussion incidence</b> or data on <b>total exposure</b> and <b>number of concussions</b> reported?                                                                                                                          | Yes <input type="checkbox"/>     | No <input type="checkbox"/>      |   |   |   |
| 3                                                                                                          | Was the study published in <b>English</b> with available <b>data from 2012 onwards</b> ?                                                                                                                                                     | Yes <input type="checkbox"/>     | No <input type="checkbox"/>      |   |   |   |
| <b>Summary:</b> Does the study fulfil all eligibility criteria?                                            |                                                                                                                                                                                                                                              | Include <input type="checkbox"/> | Exclude <input type="checkbox"/> |   |   |   |
| <b>Duplicate Data:</b> Did the study analyse the same population and timeframe as other included articles? |                                                                                                                                                                                                                                              | Yes, _____                       | No <input type="checkbox"/>      |   |   |   |
| <b>Comment:</b>                                                                                            |                                                                                                                                                                                                                                              |                                  |                                  |   |   |   |
| <b>STUDY QUALITY</b>                                                                                       |                                                                                                                                                                                                                                              |                                  |                                  |   |   |   |
| 1                                                                                                          | Main features of the study population are described: n, age and sex reported (1), not described (0)                                                                                                                                          | 0                                | 1                                |   |   |   |
| 2                                                                                                          | Participation and/or response rate was reported: PR reported & RR high (2), PR or RR reported & acceptable (1), not reported (0)                                                                                                             | 0                                | 1                                | 2 |   |   |
| 3                                                                                                          | Medical injuries histories are assessed at a time before data collection: assessed (1), not assessed (-)                                                                                                                                     | 0                                | 1                                |   |   |   |
| 4                                                                                                          | Study duration/total exposure was highly/appropriate (Multiple seasons, 1-2 seasons, less than 1 season, 1 competition): highly appropriate (4), partly highly appropriate (3), appropriate (2), partly appropriate (1), not appropriate (0) | 0                                | 1                                | 2 | 3 | 4 |
| 5                                                                                                          | Frequency of data collection: ≥daily (2), ≥weekly (1), ≥monthly (0)                                                                                                                                                                          | 0                                | 1                                | 2 |   |   |
| 6                                                                                                          | Injury definition: all concussions/medical attention (2), time loss (1), no clear definition (0)                                                                                                                                             | 0                                | 1                                | 2 |   |   |
| 7                                                                                                          | Method for assessing exposure: individual data collection (2), exposure estimated (1), not reported (0)                                                                                                                                      | 0                                | 1                                | 2 |   |   |
| 8                                                                                                          | Method for assessing injury: Validated tool (2), not stated (1), coach, self-report, media report                                                                                                                                            | 0                                | 1                                | 2 |   |   |
| 9                                                                                                          | Further details on concussion reported: context (training/match) and other details (2), context or other details (1), not reported (0)                                                                                                       | 0                                | 1                                | 2 |   |   |
| 10                                                                                                         | Appropriate data reported: incidence rate, n and total exposure (2), partly reported (1), only incidence or n reported (0)                                                                                                                   | 0                                | 1                                | 2 |   |   |
| <b>OVERALL APPRAISAL</b>                                                                                   |                                                                                                                                                                                                                                              |                                  |                                  |   |   |   |
| <b>Summary:</b>                                                                                            |                                                                                                                                                                                                                                              |                                  |                                  |   |   |   |
